# Supplementary material for: Achieving a high-performance, self-powered, broadband perovskite photodetector employing MAPbI3 microcrystal films
Source: Royal Society of Chemistry journal article supplement (doi:10.1039/c9tc05668h), 2019-12-17
Supplement: c9tc05668h1.pdf [file c9tc05668h1.pdf]

## Supporting Information

# Achieving High-Performance, Self-Powered, Broadband Perovskite Photodetector Employing $\text{MAPbI}_3$ Microcrystal Films

Xiyan Pan, Hai Zhou,\* Ronghuan Liu, Dingjun Wu, Zehao Song, Xiaomin Tang,  
Xiaohan Yang, Hao Wang\*

†Hubei Key Laboratory of Ferro & Piezoelectric Materials and Devices, Faculty of  
Physics & Electronic Science, Hubei University, Wuhan, 430062, P.R. China.

Corresponding Author

A/Prof. Hai Zhou: [hizhou@hubu.edu.cn](mailto:hizhou@hubu.edu.cn)

Prof. Hao Wang: [wangh@hubu.edu.cn](mailto:wangh@hubu.edu.cn)

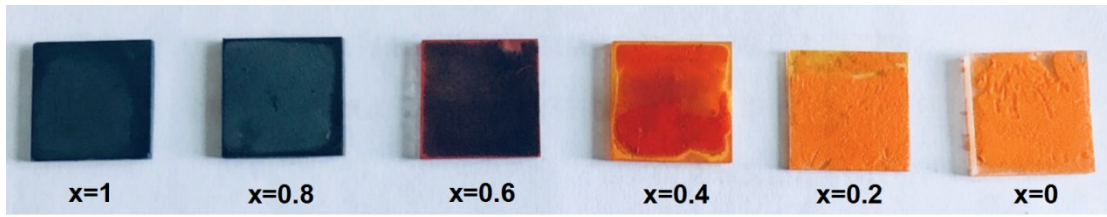

Figure S1 The photograph of MAPb(I<sub>x</sub>Br<sub>1-x</sub>)<sub>3</sub> (x = 0, 0.2, 0.4, 0.6, 0.8, 1) MC Films

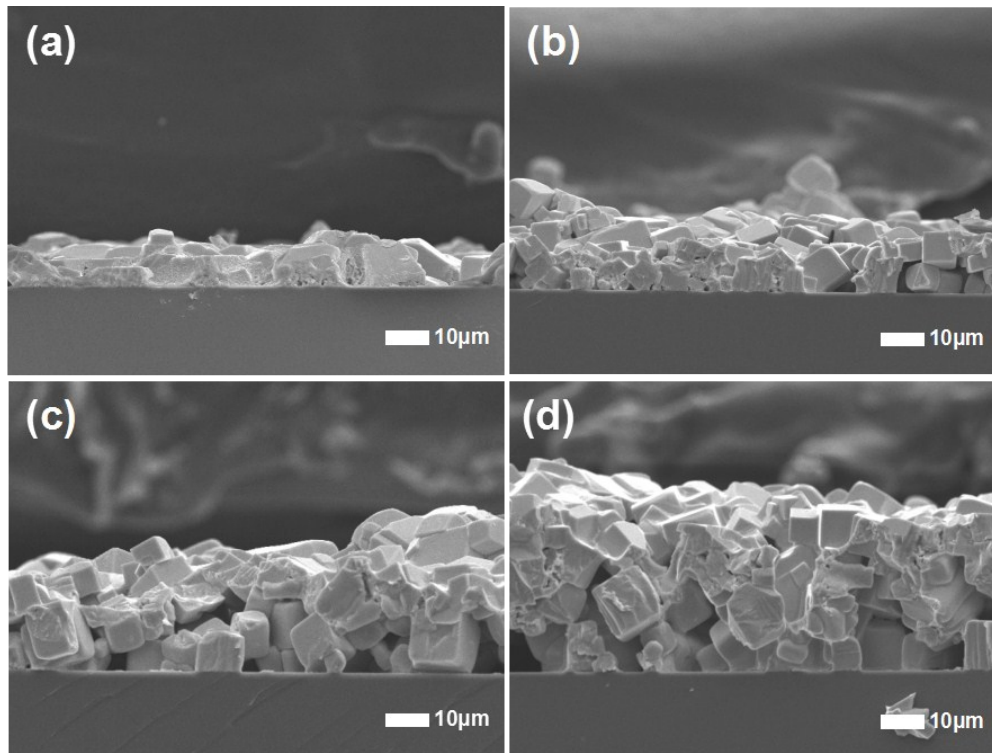

Figure S2 The MC films with the thickness of about (a) 10 μm, (b) 15 μm, (c) 25 μm and (d) 40 μm.

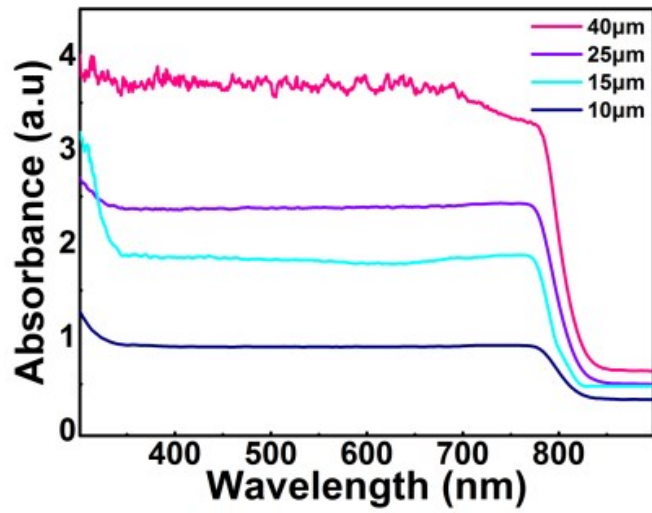

Figure S3 Light absorption curves of the MAPbI<sub>3</sub>MC films with different thicknesses.

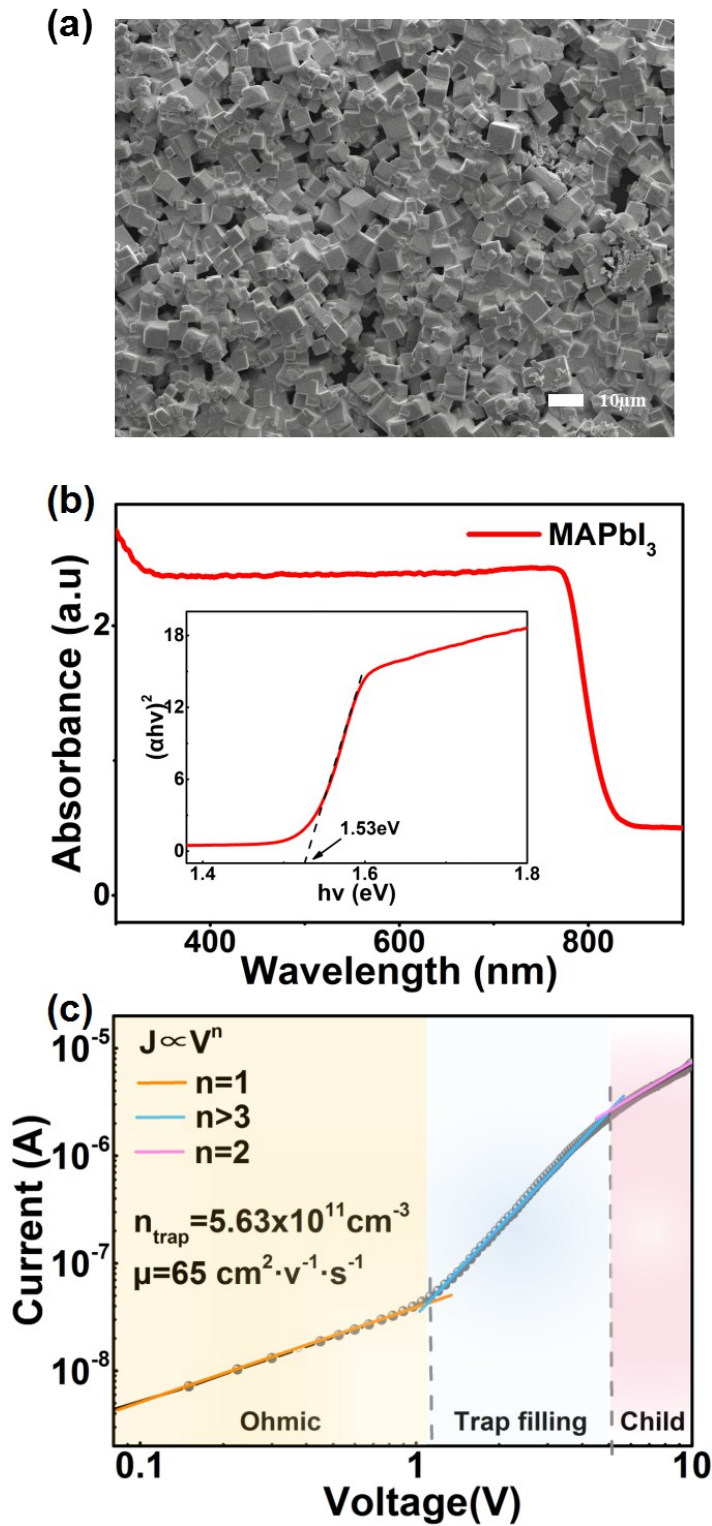

Figure S4 (a) SEM top view of the MAPbI<sub>3</sub> MCs. (b) UV-visible absorption spectrum of the MAPbI<sub>3</sub> MCs. (c) I-V curve of the MAPbI<sub>3</sub> MCs with FTO/MAPbI<sub>3</sub>/FTO structure at dark.

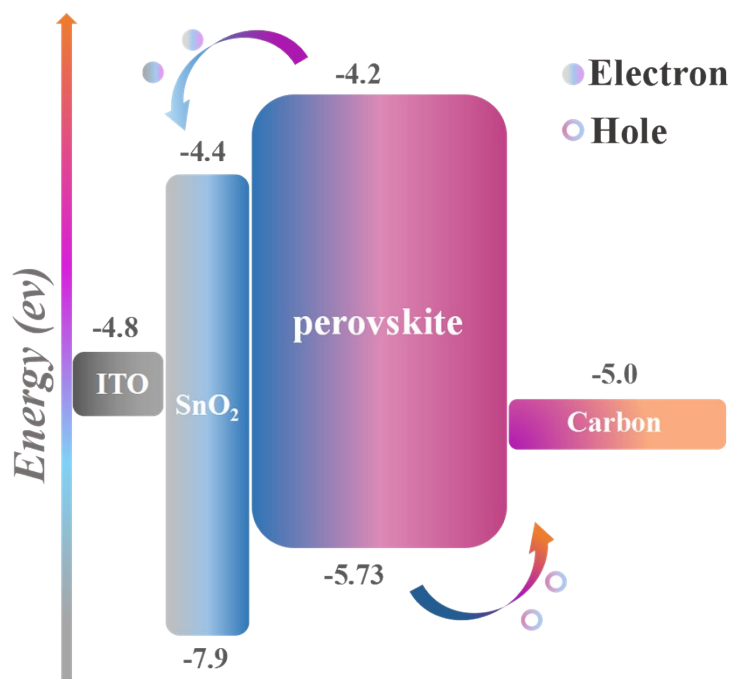

Figure S5 Energy band diagram of the perovskite MC PD.

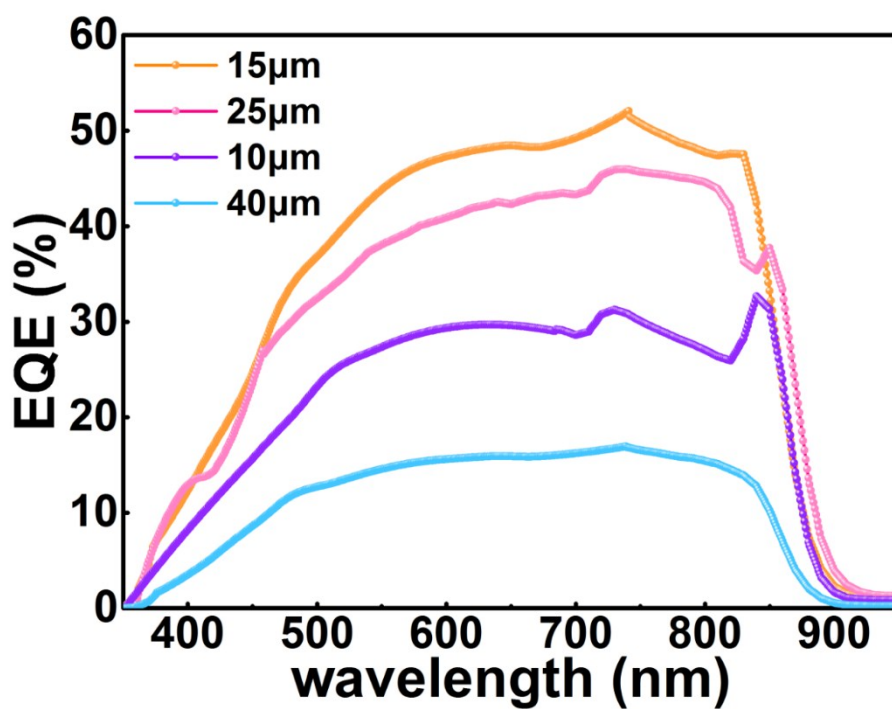

Figure S6 External quantum efficiency (EQE) of MAPbI<sub>3</sub> MCs thin film PD with different thickness at 0 V.

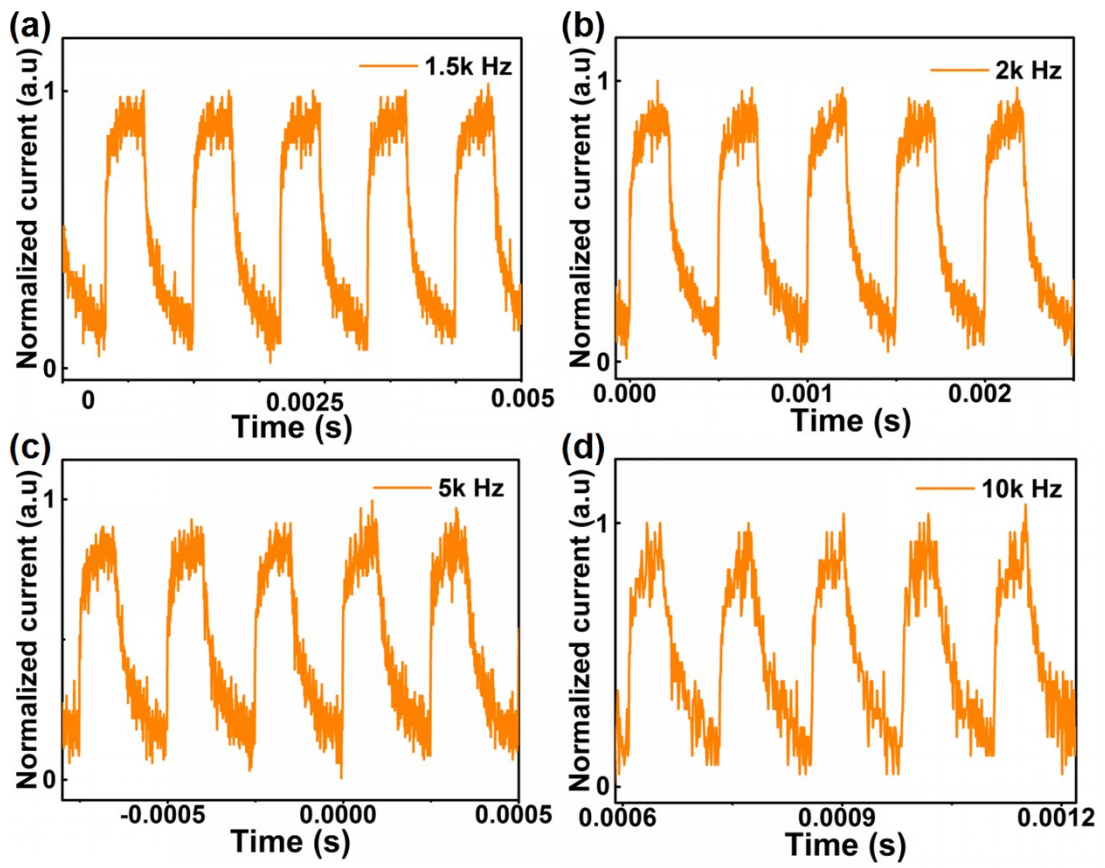

Figure S7 I-t curves of MAPbI<sub>3</sub> MCs thin film PD at different frequencies.

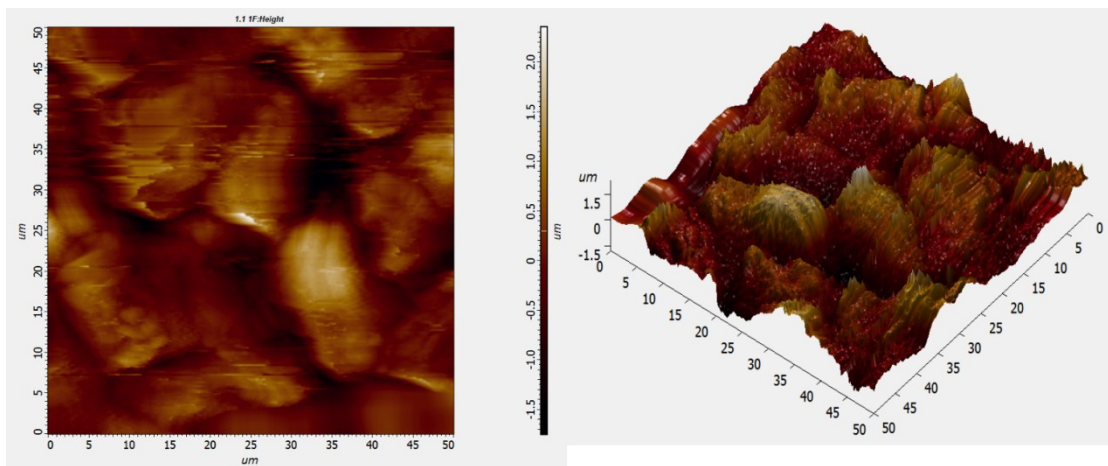

Figure S8 The AFM images of MAPbI<sub>3</sub> MC film.



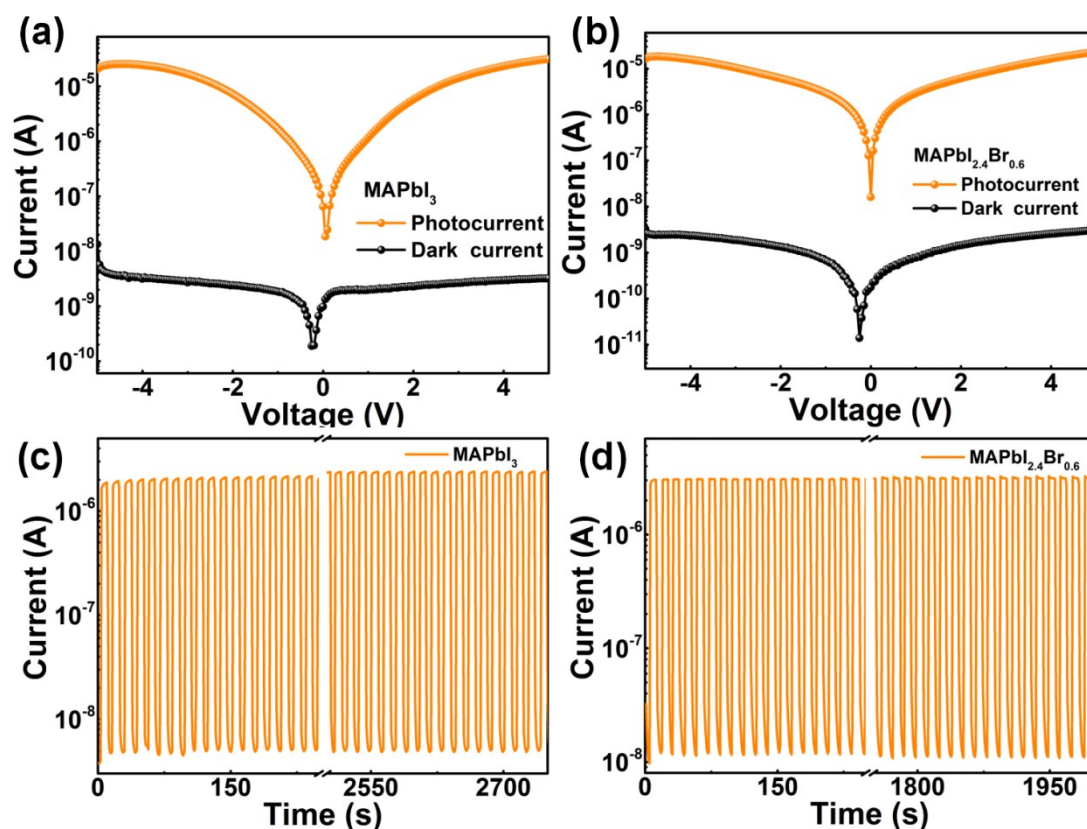

Figure S9 The device performance of metal-semiconductor-metal (MSM) structure PDs. (a) I-V curves of the MAPbI<sub>3</sub> MCPD; (b) I-V curves of the MAPbI<sub>2.4</sub>Br<sub>0.6</sub> MCPD; (c) long-time I-t curves of the MAPbI<sub>3</sub> MCPD; (d) long-time I-t curves of the MAPbI<sub>2.4</sub>Br<sub>0.6</sub> MCPD.

Figure S9 shows the device performance of metal-semiconductor-metal (MSM) structure perovskite MC PDs. Figure S9a and S9b display the dark- and photocurrent curves of the device under 473 nm laser irradiation with the light intensity of 440 mW cm<sup>-2</sup>. It can be seen that both of the MAPbI<sub>3</sub> and MAPbI<sub>2.4</sub>Br<sub>0.6</sub> MCPD show superior photoelectric response performance with the on/off ratio of about 10<sup>4</sup> at 4V, showing high switching characteristic. In addition, from the long-time I-t curves of the MAPbI<sub>3</sub> and MAPbI<sub>2.4</sub>Br<sub>0.6</sub> MCPD, we can see the photocurrent of both of the devices has almost no attenuation, indicating that our MCPDs show excellent light stability.
